# Supplementary material
Source: Springer Nature journal article supplement (https://www.springermedizin.de/resource/supplementary/13053_2013_449_MOESM2_ESM.pdf/9673862)

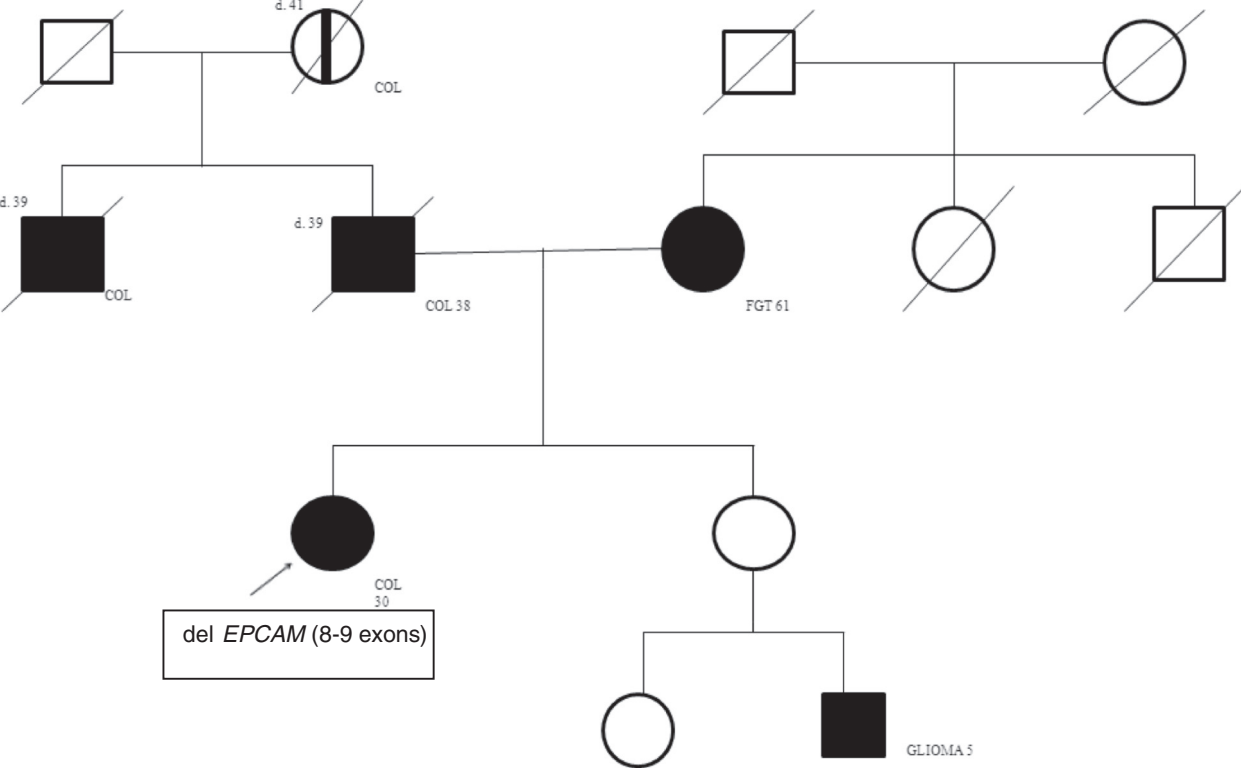

Supplement: MOESM2 [file 9673862]
